# Supplementary material for: The Effect of Zeolite Na-X and Clinoptilolite as Functional Fillers on the Mechanical, Thermal and Barrier Properties of Thermoplastic Polyurethane
Source: MDPI journal article supplement (doi:10.3390/molecules30020420), 2025-01-20
Supplement: s1 [file s1]

## SUPPLEMENTARY MATERIAL

# The effect of zeolite Na-X and Clinoptilolite as functional fillers on the mechanical, thermal and barrier properties of Thermoplastic Polyurethane

Nello Russo <sup>1,2</sup>, Letizia Verdolotti <sup>1\*</sup>, Giuseppe Cesare Lama <sup>1</sup>, Federica Recupido <sup>1</sup>, Barbara Liguori <sup>2\*</sup> and Maria Oliviero<sup>1</sup>

<sup>1</sup> Institute of Polymers, Composites and Biomaterials, National Research Council (IPCB-CNR) 80055 Portici, Naples, Italy; nellorusso@cnr.it (N.R.); giuseppecesare.lama@cnr.it (G.C.L.); federica.recupido@cnr.it (F.R.); maria.oliviero@cnr.it (M.O.)

<sup>2</sup> University of Naples Federico II, Department of Chemical, Materials and industrial production engineering 80025 Naples, Italy

\* Correspondence: letizia.verdolotti@cnr.it (L.V.), barbara.liguori@unina.it (B.L.)

### Supplementary Materials

|           |                             |
|-----------|-----------------------------|
| SECTION 1 | FTIR CHARACTERIZATION       |
| SECTION 2 | XRD CHARACTERIZATION        |
| SECTION 3 | TGA CHARACTERIZATION        |
| SECTION 4 | MECHANICAL CHARACTERIZATION |

## SECTION 1: FTIR CHARACTERIZATION

FTIR results demonstrate (Figure S1) that both types of zeolites are significantly hydrated which is illustrated by a discrete water transmittance band in the 3500 and 1640  $\text{cm}^{-1}$  region. These bands, which are centered at 3379 (OH group) and 1644  $\text{cm}^{-1}$  for Na-X and 3403 and 1627  $\text{cm}^{-1}$  for Clinoptilolite, refer to water molecules associated with the ions in the channels and cages in the of the zeolite structure [39] (reference of the main manuscript). The zeolite Na-X exhibits other bands appear near at 959  $\text{cm}^{-1}$ , 752  $\text{cm}^{-1}$  and 673  $\text{cm}^{-1}$  ascribed to asymmetric stretching of T-O group (where T= Si or Al), T-O-T group stretching and asymmetric stretching of T-O. For Clinoptilolite, the peaks at 1007  $\text{cm}^{-1}$  and 794  $\text{cm}^{-1}$  correspond to the symmetric and asymmetric stretching of O-T-O group. The other peaks, located at 722 and 671  $\text{cm}^{-1}$  are characteristic of the symmetric stretching of free tetrahedral group  $\text{TO}_4$  [40-43] (references of the main manuscript).

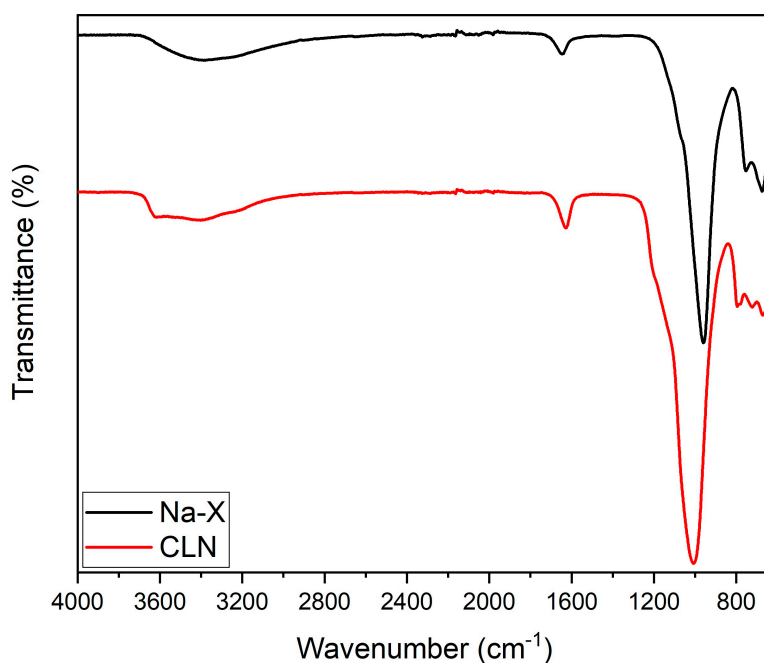

**Figure S1.** ATR spectra of Zeolite Na-X and Clinoptilolite powders

## SECTION 2: XRD CHARACTERIZATION

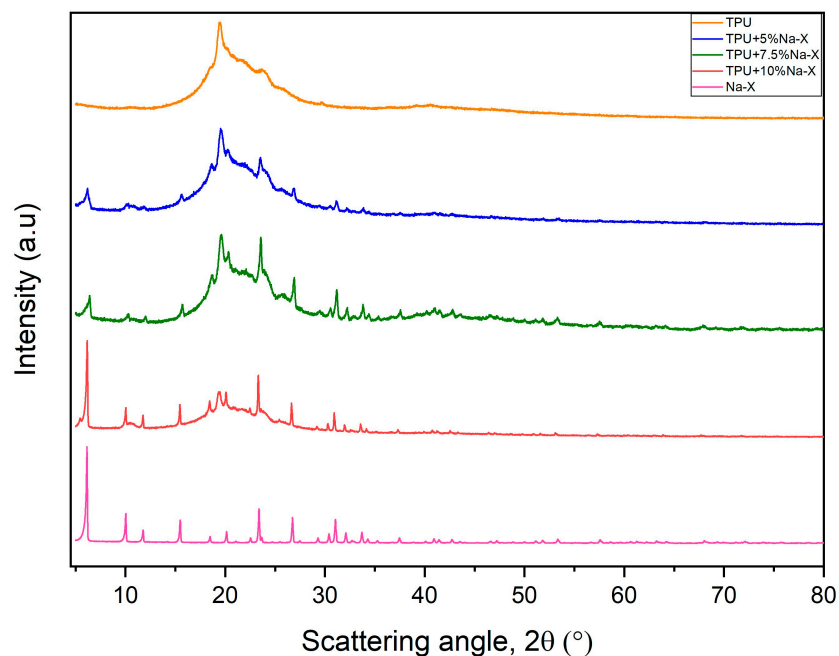

**Figure S2.** XRD spectra of Thermoplastic Polyurethane-TPU +Na-X composites.

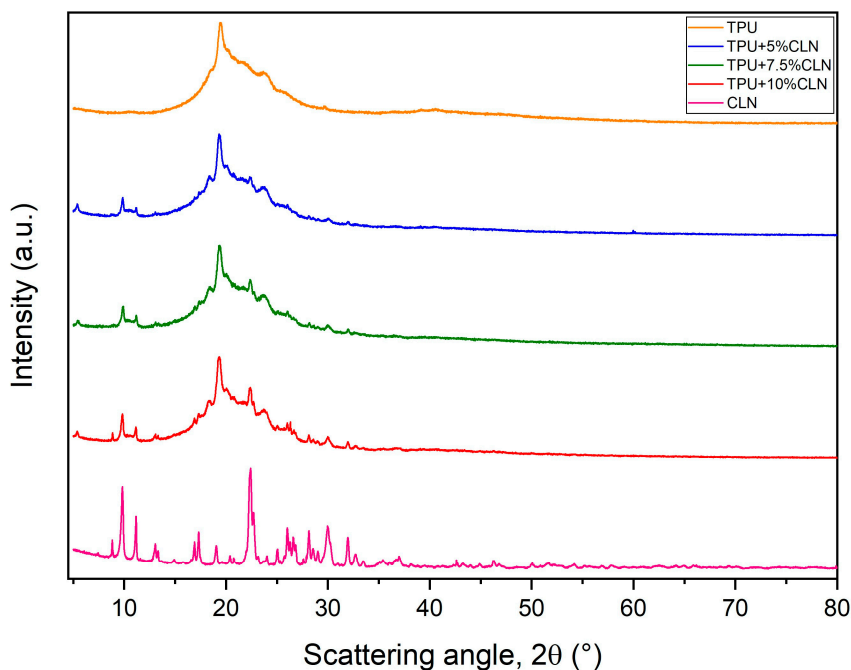

**Figure S3.** XRD spectra of Thermoplastic Polyurethane-TPU +CLN composites.

## SECTION 3: TGA CHARACTERIZATION

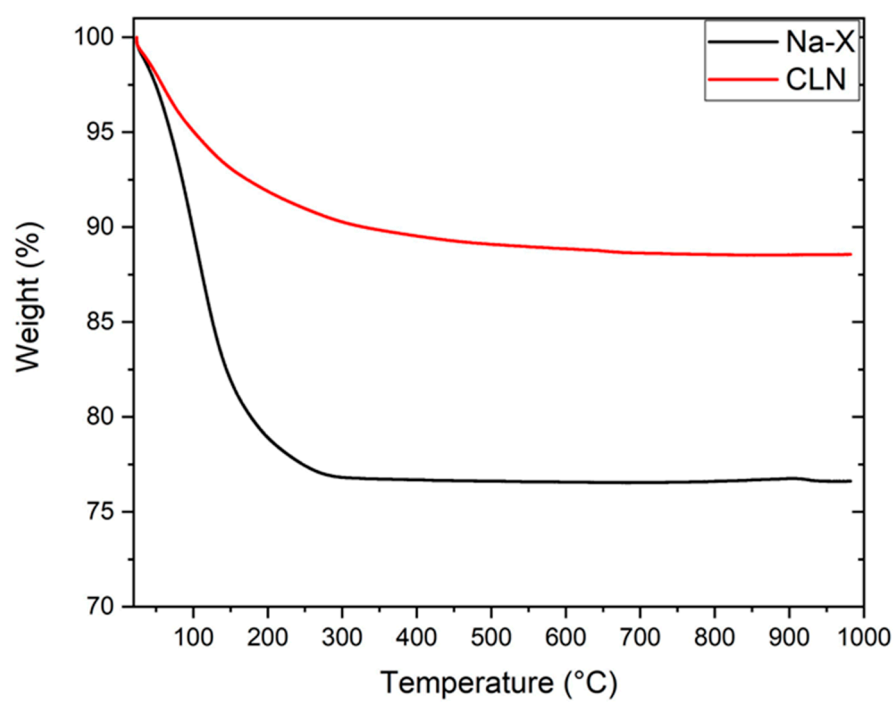

**Figure S4.** TGA curves of Zeolite Na-X and Clinoptilolite powders.

## SECTION 4: MECHANICAL CHARACTERIZATION

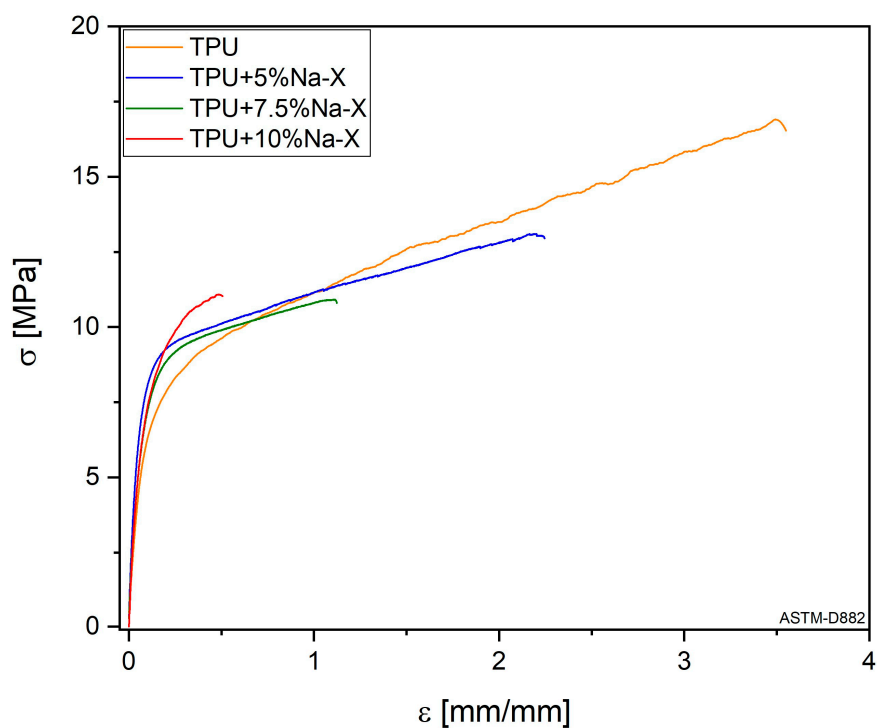

Figure S5. Stress-Strain curves of Thermoplastic Polyurethane-TPU +Na-X composites.

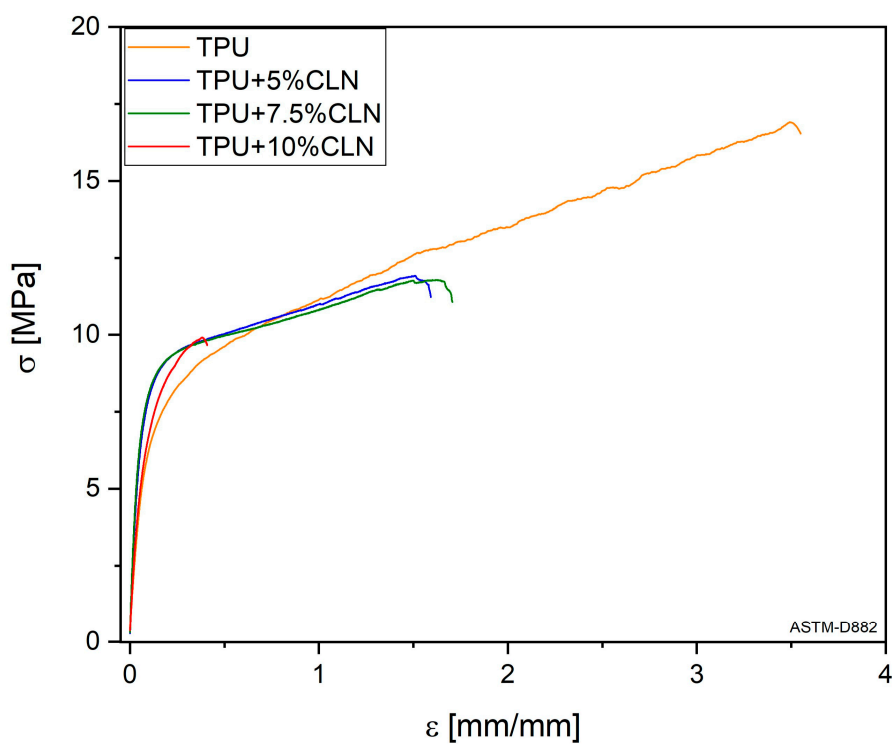

Figure S6. Stress-Strain curves of Thermoplastic Polyurethane-TPU +CLN composites.
